# Supplementary material for: Improving the Management of Patients with Hearing Loss by the Implementation of an NGS Panel in Clinical Practice
Source: PubMed Central journal article supplement (PMC7762334; doi:10.3390/genes11121467), 2020-12-07
Supplement: genes-11-01467-s001.pdf [file genes-11-01467-s001.pdf]

**Table S1.** Regions of the Panel Design with A Poor Coverage.

|       | Region   |          | Gene        | NM        | Exon | % of the Region not Covered |
|-------|----------|----------|-------------|-----------|------|-----------------------------|
|       | Start    | End      |             |           |      |                             |
| chr1  | 6484847  | 6485309  | <i>ESPN</i> | NM_031475 | 1    | 5%                          |
| chr1  | 6500313  | 6500500  | <i>ESPN</i> | NM_031475 | 3    | 50%                         |
| chr1  | 6500685  | 6500868  | <i>ESPN</i> | NM_031475 | 4    | 40%                         |
| chr1  | 6505723  | 6505995  | <i>ESPN</i> | NM_031475 | 7    | 75%                         |
| chr1  | 6508700  | 6509151  | <i>ESPN</i> | NM_031475 | 8    | 12%                         |
| chr1  | 6511662  | 6511808  | <i>ESPN</i> | NM_031475 | 9    | 13%                         |
| chr16 | 21742157 | 21742251 | <i>OTOA</i> | NM_144672 | 20   | 90%                         |
| chr16 | 21747581 | 21747711 | <i>OTOA</i> | NM_144672 | 21   | 20%                         |
| chr16 | 21752041 | 21752229 | <i>OTOA</i> | NM_144672 | 22   | 100%                        |
| chr16 | 21756201 | 21756357 | <i>OTOA</i> | NM_144672 | 23   | 100%                        |
| chr16 | 21763255 | 21763398 | <i>OTOA</i> | NM_144672 | 24   | 100%                        |
| chr16 | 21763689 | 21763826 | <i>OTOA</i> | NM_144672 | 25   | 100%                        |
| chr16 | 21768402 | 21768598 | <i>OTOA</i> | NM_144672 | 27   | 100%                        |
| chr16 | 21771790 | 21772050 | <i>OTOA</i> | NM_144672 | 28   | 100%                        |
| chr15 | 43891760 | 43891958 | <i>STRC</i> | NM_153700 | 29   | 75%                         |
| chr15 | 43892157 | 43892305 | <i>STRC</i> | NM_153700 | 28   | 65%                         |
| chr15 | 43892731 | 43892880 | <i>STRC</i> | NM_153700 | 26   | 8%                          |
| chr15 | 43893069 | 43893212 | <i>STRC</i> | NM_153700 | 25   | 6%                          |
| chr15 | 43896193 | 43896350 | <i>STRC</i> | NM_153700 | 22   | 100%                        |
| chr15 | 43896847 | 43897044 | <i>STRC</i> | NM_153700 | 20   | 50%                         |
| chr15 | 43897461 | 43897597 | <i>STRC</i> | NM_153700 | 19   | 25%                         |
| chr15 | 43900060 | 43900173 | <i>STRC</i> | NM_153700 | 18   | 30%                         |
| chr15 | 43900277 | 43900401 | <i>STRC</i> | NM_153700 | 17   | 50%                         |
| chr15 | 43901473 | 43901532 | <i>STRC</i> | NM_153700 | 16   | 100%                        |
| chr15 | 43902509 | 43902635 | <i>STRC</i> | NM_153700 | 15   | 90%                         |
| chr15 | 43903116 | 43903182 | <i>STRC</i> | NM_153700 | 14   | 100%                        |
| chr15 | 43903345 | 43903513 | <i>STRC</i> | NM_153700 | 13   | 50%                         |
| chr15 | 43903696 | 43903735 | <i>STRC</i> | NM_153700 | 12   | 100%                        |
| chr15 | 43904039 | 43904222 | <i>STRC</i> | NM_153700 | 11   | 100%                        |
| chr15 | 43904574 | 43904707 | <i>STRC</i> | NM_153700 | 10   | 100%                        |
| chr15 | 43904988 | 43905104 | <i>STRC</i> | NM_153700 | 9    | 100%                        |
| chr15 | 43905242 | 43905429 | <i>STRC</i> | NM_153700 | 8    | 100%                        |
| chr15 | 43906084 | 43906251 | <i>STRC</i> | NM_153700 | 7    | 100%                        |
| chr15 | 43906393 | 43906510 | <i>STRC</i> | NM_153700 | 6    | 100%                        |
| chr15 | 43906611 | 43906674 | <i>STRC</i> | NM_153700 | 5    | 85%                         |
| chr15 | 43907630 | 43908888 | <i>STRC</i> | NM_153700 | 4    | 100%                        |
| chr15 | 43909655 | 43909680 | <i>STRC</i> | NM_153700 | 3    | 100%                        |
| chr15 | 43909768 | 43910554 | <i>STRC</i> | NM_153700 | 2    | 30%                         |
| chr15 | 43910856 | 43910998 | <i>STRC</i> | NM_153700 | 1    | 90%                         |
